# Supplementary material
Source: PubMed Central journal article supplement (PMC10347423)
Supplement: sf-apr-20-182-file004_soad025.pdf [file sf-apr-20-182-file004_soad025.pdf]

# **Our Friends Keep Us Together - The Stability of Adolescents' Cross-Race Friendships**

## **Supplemental Material**

### **Appendix A – Additional Figures.**

Figure A1. Average Marginal Effect on Friendship Retention of Different Race Dyad in PROSPER (Models from Table 4).

Figure A2. Average Marginal Effect on Friendship Retention of Disaggregated Ego/Alter Race in PROSPER (Models 1 and 5 in Table 5).

Figure A3. Key Results Using Pseudo-likelihood Temporal Exponential Random Graph Model (TERGM).

Figure A3 shows results of a pseudo-likelihood temporal exponential random graph model (TERGM). Full MCMC TERGMs do not converge consistently in this sample, mainly due to the small number of non-white students in a given school/wave combination creating low support and non-variation or high collinearity that inhibits estimation. This figure shows results of the pseudo-likelihood version of the TERGM, which enables estimation but is known to have biased standard errors. This model includes the cross-race dyad indicator in the formation and persistence equations along with a minimal set of the most important terms to assess potential concerns of bias due to survey design or higher-order network structural processes. The figure shows that results are consistent with the results presented in the main manuscript, which enable greater statistical power for more reliable estimates and estimation of key elements of interest in the research question that cannot currently be estimated in a TERGM.
